# Supplementary material
Source: PubMed Central journal article supplement (PMC4313232)
Supplement: JCM.02028-14_zjm999093818so2.pdf [file JCM.02028-14_zjm999093818so2.pdf]

Fig. A2

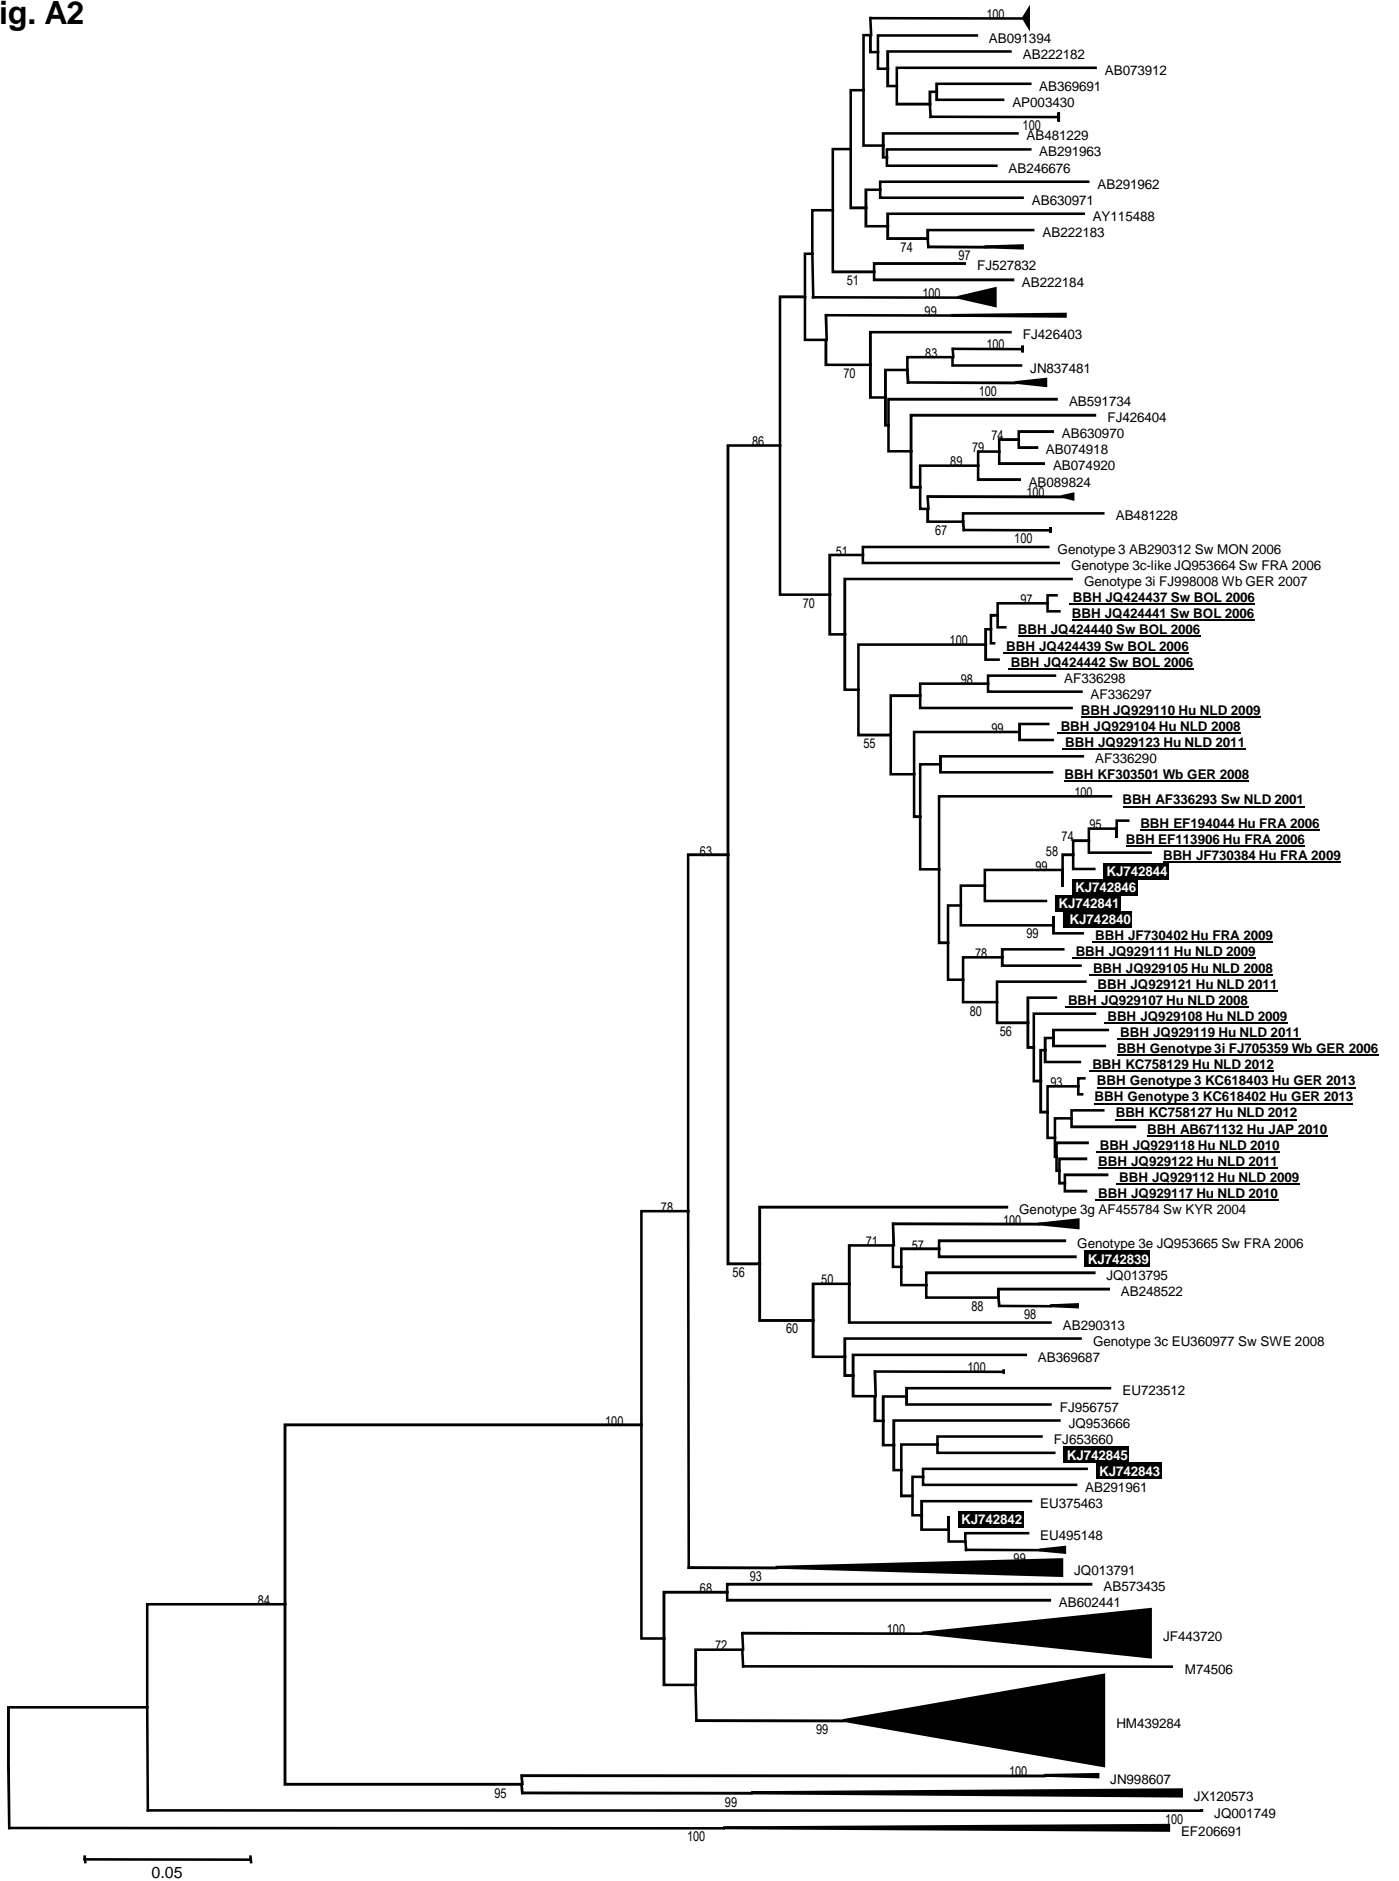

**Figure A2.** Phylogenetic tree based on a 231-nucleotide partial sequence of open reading frame 2 (ORF) 2 of the HEV genome (a fragment from the 343 nucleotide-long sequence analyzed in Figure 1 that corresponds to nucleotides 6,063-6,293 of genome GenBank accession no. FJ705359).

The HEV sequences obtained in our laboratory are indicated by a black frame. The 10 sequences with the highest BLAST scores (excluding those from our laboratory or with a query coverage <98%) recovered from the NCBI GenBank nucleotide sequence database (indicated in boldface, underlined, labeled with BBH (for best BLAST hit), GenBank accession number, host, country and year of sample collection or sequence submission) with the near full-length genome obtained in this study (GenBank accession no. KJ701409) have been incorporated into the phylogeny reconstruction in addition to a comprehensive set of 245 full-length genome sequences that were downloaded from the Virus Pathogen Resource database (1) (labeled, if they are clustered with sequences from the present study, with genotype and subtype, GenBank accession number, host, country and year of sample collection or sequence submission). To allow for the better legibility of the tree, branches were collapsed when they did not directly link to sequences from the present study and when the bootstrap value at node was >90%. Nucleotide alignments were performed using the MUSCLE software (<http://www.ebi.ac.uk/Tools/msa/muscle/>). The tree was constructed using the MEGA 5 software (<http://www.megasoftware.net/>) and the neighbor-joining method. Branches with bootstrap values were obtained from 1,000 resamplings of the data, and values >50% are labeled on the tree. The scale bar indicates the number of nucleotide substitutions per site.

BBH, best BLAST hit; BOL, Bolivia; GER, Germany; FRA, France; Hu, Human; JAP, Japan; KYR, Kyrgyzstan; MON, Mongolia; NLD, the Netherlands; Sw, Swine; SWE, Sweden; URU, Uruguay; Wb, wild boar.
