# Supplementary material
Source: PubMed Central journal article supplement (PMC4313232)
Supplement: JCM.02028-14_zjm999093818so3.pdf [file JCM.02028-14_zjm999093818so3.pdf]

# APPENDIXES

## LEGENDS TO APPENDIX FIGURES

**Figure A1.** Phylogenetic tree based on a 343-nucleotide partial sequence corresponding to nucleotides 5999-6342 of open reading frame 2 (ORF2) of the HEV genome (GenBank accession no. AF082843).

The legend of this figure is the same as that of Figure 1, except the tree was built using the Maximum Likelihood method based on the General Time Reversible model. Initial tree(s) for the heuristic search were obtained by applying the Neighbor-Joining method to a matrix of pairwise distances estimated using the Maximum Composite Likelihood (MCL) approach. A discrete Gamma distribution was used to model evolutionary rate differences among sites (5 categories (+G, parameter = 0.6239)). The tree is drawn to scale, with branch lengths measured in the number of substitutions per site. The analysis involved 261 nucleotide sequences and there were a total of 343 positions in the final dataset.

**Figure A2.** Phylogenetic tree based on a 231-nucleotide partial sequence of open reading frame 2 (ORF) 2 of the HEV genome (a fragment from the 343 nucleotide-long sequence analyzed in Figure 1 that corresponds to nucleotides 6,063-6,293 of genome GenBank accession no. FJ705359).

The HEV sequences obtained in our laboratory are indicated by a black frame. The 10 sequences with the highest BLAST scores (excluding those from our laboratory or with a query coverage <98%) recovered from the NCBI GenBank nucleotide sequence database (indicated in boldface, underlined, labeled with BBH (for best BLAST hit), GenBank accession number, host, country and year of sample collection or sequence submission) with

26 the near full-length genome obtained in this study (GenBank accession no. KJ701409) have  
27 been incorporated into the phylogeny reconstruction in addition to a comprehensive set of 245  
28 full-length genome sequences that were downloaded from the Virus Pathogen Resource  
29 database (1) (labeled, if they are clustered with sequences from the present study, with  
30 genotype and subtype, GenBank accession number, host, country and year of sample  
31 collection or sequence submission). To allow for the better legibility of the tree, branches  
32 were collapsed when they did not directly link to sequences from the present study and when  
33 the bootstrap value at node was >90%. Nucleotide alignments were performed using the  
34 MUSCLE software (<http://www.ebi.ac.uk/Tools/msa/muscle/>). The tree was constructed using  
35 the MEGA 5 software (<http://www.megasoftware.net/>) and the neighbor-joining method.  
36 Branches with bootstrap values were obtained from 1,000 resamplings of the data, and values  
37 >50% are labeled on the tree. The scale bar indicates the number of nucleotide substitutions  
38 per site.

39 BBH, best BLAST hit; BOL, Bolivia; GER, Germany; FRA, France; Hu, Human; JAP, Japan;  
40 KYR, Kyrgyzstan; MON, Mongolia; NLD, the Netherlands; Sw, Swine; SWE, Sweden;  
41 URU, Uruguay; Wb, wild boar.

42

43

## APPENDIX TABLES

**Table A1.** Main characteristics of the 8 chronically-HEV infected patients

| Case no. | Age (years) | Gender | Date of presumed<br>HEV infection | Time since kidney-<br>transplantation (months) | HEV testing at diagnosis |              |              |
|----------|-------------|--------|-----------------------------------|------------------------------------------------|--------------------------|--------------|--------------|
|          |             |        |                                   |                                                | HEV RNA                  | Anti-HEV IgM | Anti-HEV IgG |
| 1        | 46          | M      | 27-Apr-09                         | 56                                             | +                        | +            | +            |
| 2        | 55          | M      | 02-Apr-04                         | 70                                             | +                        | +            | +            |
| 3        | 64          | M      | 19-Jun-06                         | 121                                            | +                        | +            | +            |
| 4        | 53          | M      | 27-Jun-06                         | 14                                             | +                        | +            | -            |
| 5        | 43          | M      | 26-Sep-06                         | 25                                             | +                        | +            | +            |
| 6        | 73          | M      | 02-May-07                         | 107                                            | +                        | +            | -            |
| 7        | 50          | F      | 05-Nov-07                         | 12                                             | +                        | N.t.         | N.t.         |
| 8        | 46          | M      | 18-Aug-08                         | 59                                             | +                        | -            | -            |

+, positive; -, negative; IgG, immunoglobulin G; IgM, immunoglobulin M; M, male; F, female; N.t., not tested

**Table A2.** PCR primers used in the present study

| Name                                                 | Orientation                 | Nucleotide positions amplified <sup>a</sup> | Sequence length (nt) | HEV genes | Sequences (indicated in 5'-3' orientation)                                                                            | Reference     |
|------------------------------------------------------|-----------------------------|---------------------------------------------|----------------------|-----------|-----------------------------------------------------------------------------------------------------------------------|---------------|
| F25<br>R5500                                         | ESP<br>EAP                  | 7-251                                       | 245                  | ORF1      | GGTCGAYGCCATGGAGGCC<br>GVGGGGCGCTGGGACTGGTCAS                                                                         | (2)           |
| HEVORF1con<br>HEVORF1con                             | ESP<br>EAP                  | 54-471                                      | 418                  | ORF1      | CTGGCATYACTACTGCYATTGAGC<br>CCATCRARRCAGTAAGTGCGGTC                                                                   | (3)           |
| Mars1<br>Mars2                                       | ESP<br>AP                   | 369-1009                                    | 641                  | ORF1      | AGAGAYGYCAGCGCTGGTA<br>RAGCATGAGCCGRTCCCA                                                                             | Present study |
| None<br>None                                         | ESP<br>AP                   | 933-2102                                    | 1170                 | ORF1      | ACAGAGGTGTATGTTAGATCCATATTTGGC<br>GGGGAGAAGTCGCTAGAGAAACCTGATGT                                                       | (4)           |
| MJ-B<br>MJ-B<br>MJ-B                                 | ESP<br>EAP<br>IAP           | 2085-2351                                   | 267                  | ORF1      | GCATRTTTGGGAGTCKGCTAATCC<br>GCATGGCAGAGSCCGCCCGGGGC<br>ACCTTAGMGCCGTCMGGGTAGGT                                        | (5)           |
| MJ-B<br>MJ-C                                         | ESP<br>EAP                  | 2148-2779                                   | 632                  | ORF1      | GCATRTTTGGGAGTCKGCTAATCC<br>AGGGTGCCGGGCTCGCCGGA                                                                      | (5)           |
| Mars3<br>Mars4                                       | ESP<br>AP                   | 2705-3847                                   | 1143                 | ORF1      | GCAGCATATCGAGAGACCTG<br>GTGAGCTCTTGTGGCATGTA                                                                          | Present study |
| Mars5<br>Mars6<br>Mars7<br>Mars8<br>Mars9            | ESP<br>AP<br>AP<br>AP<br>AP | 3756-4473                                   | 718                  | ORF1      | AATGCRTCKAAYCCYGGC<br>GCACARAGGTYYTTRCTCCA<br>CAAACCTCAGAAAARTCRITCTCAAT<br>GCATSCCACACTCCTCCAT<br>CRCCGGARTGYTTCTTCC | Present study |
| MJ-B<br>MJ-C                                         | ISP<br>IAP                  | 3848-4579                                   | 732                  | ORF1      | ACWTTKTATACCCGTA CTGGTC<br>TCACCGAGTGYTTCTTCCAGAA                                                                     | (5)           |
| None<br>None                                         | SP<br>AP                    | 4559-5169                                   | 611                  | ORF1-ORF3 | ACAGAGGTGTATGTTAGATCCATATTTGGC<br>GGGGAGAAGTCGCTAGAGAAACCTGATGT                                                       | (4)           |
| F25<br>R5470                                         | ESP<br>IAP                  | 5152-5601                                   | 450                  | ORF3-ORF2 | GGTCGAYGCCATGGAGGCC<br>GGGACTGGTCRGCCAAG                                                                              | (2)           |
| Mars10<br>Mars11                                     | SP<br>AP                    | 5213-5983                                   | 771                  | ORF3-ORF2 | CATGCGCCCTAGGGYTGT<br>AGCCATGTATGCARAGCATWAC                                                                          | Present study |
| HevMrsFwd1<br>HevMrsFwd2<br>HevMrsRev2<br>HevMrsRev1 | ESP<br>ISP<br>IAP<br>EAP    | 5711-6475                                   | 765                  | ORF2      | AATTATGCYCAGTAYCGRGTT<br>GTWATGCTYTGATACATGGCT<br>AGCCGACGAAATCAATTCTGTC<br>CCCTTRTCYTGCTGRGCATTCTC                   | (6)           |
| None<br>None                                         | SP<br>AP                    | 6372-7125                                   | 754                  | ORF2      | ACAGAGGTGTATGTTAGATCCATATTTGGC<br>GGGGAGAAGTCGCTAGAGAAACCTGATGT                                                       | (4)           |

<sup>a</sup> A, antisense; E, external; I, internal; P, primer; S, sense

## Reference List

1. **Pickett, B. E., E. L. Sadat, Y. Zhang, J. M. Noronha, R. B. Squires, V. Hunt, M. Liu, S. Kumar, S. Zaremba, Z. Gu, L. Zhou, C. N. Larson, J. Dietrich, E. B. Klem, and R. H. Scheuermann.** 2012. ViPR: an open bioinformatics database and analysis resource for virology research. *Nucleic Acids Res.* **40**:D593-D598.
2. **Peralta, B., E. Mateu, M. Casas, D. N. de, M. Martin, and S. Pina.** 2009. Genetic characterization of the complete coding regions of genotype 3 hepatitis E virus isolated from Spanish swine herds. *Virus Res.* **139**:111-116.
3. **Erker, J. C., S. M. Desai, and I. K. Mushahwar.** 1999. Rapid detection of Hepatitis E virus RNA by reverse transcription-polymerase chain reaction using universal oligonucleotide primers. *J Virol.Methods* **81**:109-113. doi:S0166-0934(99)00052-X [pii].
4. **Legrand-Abravanel, F., J. M. Mansuy, M. Dubois, N. Kamar, J. M. Peron, L. Rostaing, and J. Izopet.** 2009. Hepatitis E virus genotype 3 diversity, France. *Emerg.Infect.Dis.* **15**:110-114.
5. **Zhai, L., X. Dai, and J. Meng.** 2006. Hepatitis E virus genotyping based on full-length genome and partial genomic regions. *Virus Res.* **120**:57-69.
6. **Kaba, M., B. Davoust, J. L. Marie, M. Barthet, M. Henry, C. Tamalet, D. Raoult, and P. Colson.** 2009. Frequent transmission of hepatitis E virus among piglets in farms in Southern France. *J Med.Virol.* **81**:1750-1759.
